# Supplementary material for: Deionococcus proteotlycius Genomic Library Exploration Enhances Oxidative Stress Resistance and Poly-3-hydroxybutyrate Production in Recombinant Escherichia coli
Source: MDPI journal article supplement (doi:10.3390/microorganisms11092135), 2023-08-23
Supplement: s1 [file s1]

## *Supplementary Material*

# ***Deionococcus proteotlycius* Genomic Library Exploration Enhances Oxidative Stress Resistance and Poly-3-hydroxybutyrate Production in Recombinant *Escherichia coli***

Seul-Ki Yang <sup>1,2</sup>, Soyoung Jeong <sup>1,3</sup>, Inwoo Baek <sup>1</sup>, Jong-il Choi <sup>4</sup>, Sangyong Lim <sup>1,5</sup> and Jong-Hyun Jung <sup>1,\*</sup>

<sup>1</sup> Radiation Biotechnology Division, Korea Atomic Energy Research Institute, Jeongseup 56212, Republic of Korea; wisdomyang@kaeri.re.kr (S.-K.Y.); soyoung@kaeri.re.kr (S.J.);

inwoobaek@kaeri.re.kr (I.B.); saylim@kaeri.re.kr (S.L.)

<sup>2</sup> Graduate School of Biotechnology and Institute of Life Science and Resources, Kyung Hee University, Yongin 17104, Republic of Korea

<sup>3</sup> Department of Food and Animal Biotechnology, Seoul National University, Seoul 08826, Republic of Korea

<sup>4</sup> Department of Biotechnology and Bioengineering, Chonnam National University, Gwangju 61186, Republic of Korea; choiji01@chonnam.ac.kr

<sup>5</sup> Department of Radiation Science and Technology, University of Science and Technology, Daejeon 34113, Republic of Korea

\* Correspondence: [jungjh83@kaeri.re.kr](mailto:jungjh83@kaeri.re.kr); Tel: +82-63-570-3203; Fax: +82-63-570-3238

**Keywords:** *Deinococcus proteolyticus*, oxidative stress, response regulator, PHB

**Supple Table S1. List of quantitative real-time PCR primers in this study**

| Pathway                              | Gene        | Forward primer           | Reverse primer                 |
|--------------------------------------|-------------|--------------------------|--------------------------------|
| Internal control                     | <i>polA</i> | GCTGAACGTGCAGCCATTAA     | CAATCATCGCCCGTTTGATAA          |
|                                      | <i>dnaA</i> | TGGCGAAAGAGCTGACTAACC    | ACGGCAGGCATGAAGCA              |
| Oxidative stress related gene        | <i>katE</i> | CAATTCCACAAGGGCAAAGT     | CTTCCCTTCGGCATTAAATCA          |
|                                      | <i>katG</i> | GCATCTGCTTCTACCTTCCG     | CTCAACACCAACCACACCAG           |
|                                      | <i>dps</i>  | AAACAAGCGCACTGGAACAT     | CTGCACTGCACGTTCTGC             |
|                                      | <i>ahpC</i> | ACTGCAGAAACTGGGCGTAG     | GTTGTCGAAGTTACGGGTCAG          |
|                                      | <i>sodA</i> | GCTGAAAGGCGATAAACTGG     | ACACATCCAGGCCCATATC            |
| Sigma factors                        | <i>rpoS</i> | CGCCGCCGGATGATC          | CAGACCACGATTGCCATAACG          |
| Oxidative stress regulator           | <i>oxyR</i> | GAAGCACAGACCCACCAGTT     | CAAACAACGGCACTTCAATG           |
|                                      | <i>soxS</i> | TACTTGCAACGAATGTTCCG     | ACATAACCCAGGTCCATTGC           |
| Pentose phosphate pathway Glycolysis | <i>ptsG</i> | ACTGGCGTTGTGCTGTCCTT     | GGTAAGCAGCCCACTGAGAGA          |
|                                      | <i>zwf</i>  | GGCGCTGCGTTTTGCTAA       | TTCTGCCACGGTAATCTCAACA         |
|                                      | <i>pykA</i> | GCGCTGACCGAAAAAGACAA     | CAGCCAGGTAATCTACGCCAAT         |
|                                      | <i>pykF</i> | CGAGTTCAACAATGACAACCGTAA | ATCAGCGGAGCATCCAGTTT           |
|                                      | <i>aceE</i> | CCAAAGGCAAAGCGACAGTAAT   | CCTGGTGCGCGATGTTTT             |
| TCA cycle                            | <i>icdA</i> | AAGTTCACCGAAGGAGCGTTTA   | GCCACCGTCGATCAGTTCA            |
|                                      | <i>sucA</i> | GTCTCGCGTTGCCAAGATTTAT   | GTGGCGTAAGCGAGGTTTTTC          |
|                                      | <i>mdh</i>  | AGGCGCTTGCACTACTGTTAAAA  | CGGGAGTCACTGGAGCGATA           |
|                                      | <i>sdhC</i> | CACATGATGATGGATTTTGGCTAT | GCACGACAGTAATAACAAAGGA<br>GATT |
| Gluconeogenesis and anaplerosis      | <i>pps</i>  | CCTCCCTGGGTGAAATGATTACTA | GGCGGTTGTGGCGAAA               |
|                                      | <i>ppc</i>  | GGAAGAGAACCTCGGCTACAAA   | CCGCCCATCCACGAAGT              |
|                                      | <i>pck</i>  | CGTCTTTCCGTCCGTTTCAT     | GCTCGGGCGAATAAACATGT           |
|                                      | <i>maeB</i> | GAAGAGCTGGCGGAGATCAC     | GCGGCTCAATACCAAAACGA           |
|                                      | <i>sfcA</i> | TGCGGTTGGCAAAATGG        | AGGGCTTCGGCAGAGGTT             |
| Glyoxylate shunt                     | <i>aceA</i> | TGCACGGTGAGTCGAAAAAA     | TAGACTGCTTCAATACCCGCTTT        |
|                                      | <i>aceB</i> | TGGCGTGGTGAGGCAAT        | GGAAGAAATAGAGCGCAAAATCA        |

**Supple Table S2. Genetic information of the neighbor genes of *deipr\_0871* and its homolog, *dr\_0891***

| <b>The list of genes in <i>D. proteolyticus</i></b> |                 |                                                               |
|-----------------------------------------------------|-----------------|---------------------------------------------------------------|
| <b>locus_tag</b>                                    | <b>Location</b> | <b>Product</b>                                                |
| Deipr_0866                                          | 918064..917162  | hypothetical protein                                          |
| Deipr_0867                                          | 919101..918133  | NUDIX hydrolase                                               |
| Deipr_0868                                          | 919285..919527  | cold-shock DNA-binding domain protein                         |
| Deipr_0869                                          | 921102..919723  | Methylenetetrahydrofolate--tRNA-(uracil-5-)-methyltransferase |
| Deipr_0870                                          | 921241..922314  | integral membrane sensor signal transduction histidine kinase |
| Deipr_0871                                          | 922311..923012  | two component transcriptional regulator, LuxR family          |
| Deipr_0872                                          | 923052..923813  | protein of unknown function DUF124                            |
| Deipr_0873                                          | 924924..923878  | thioredoxin reductase                                         |
| Deipr_0874                                          | 925053..925643  | Holliday junction ATP-dependent DNA helicase ruvA             |

  

| <b>The list of genes in <i>D. radiodurans</i></b> |                 |                                                  |
|---------------------------------------------------|-----------------|--------------------------------------------------|
| <b>locus_tag</b>                                  | <b>Location</b> | <b>Product</b>                                   |
| DR_0888                                           | 897508..898269  | hypothetical protein                             |
| DR_0889                                           | 898277..898627  | hypothetical protein                             |
| DR_0890                                           | 898628..899065  | conserved hypothetical protein                   |
| DR_0891                                           | 899727..899143  | DNA-binding response regulator                   |
| DR_0892                                           | 900833..899724  | sensor histidine kinase                          |
| DR_0893                                           | 901689..900994  | conserved hypothetical protein                   |
| DR_0894                                           | 903279..901774  | hypothetical protein                             |
| DR_0895                                           | 903383..903769  | hypothetical protein                             |
| DR_0896                                           | 903759..904532  | ribosomal large subunit pseudouridine synthase B |

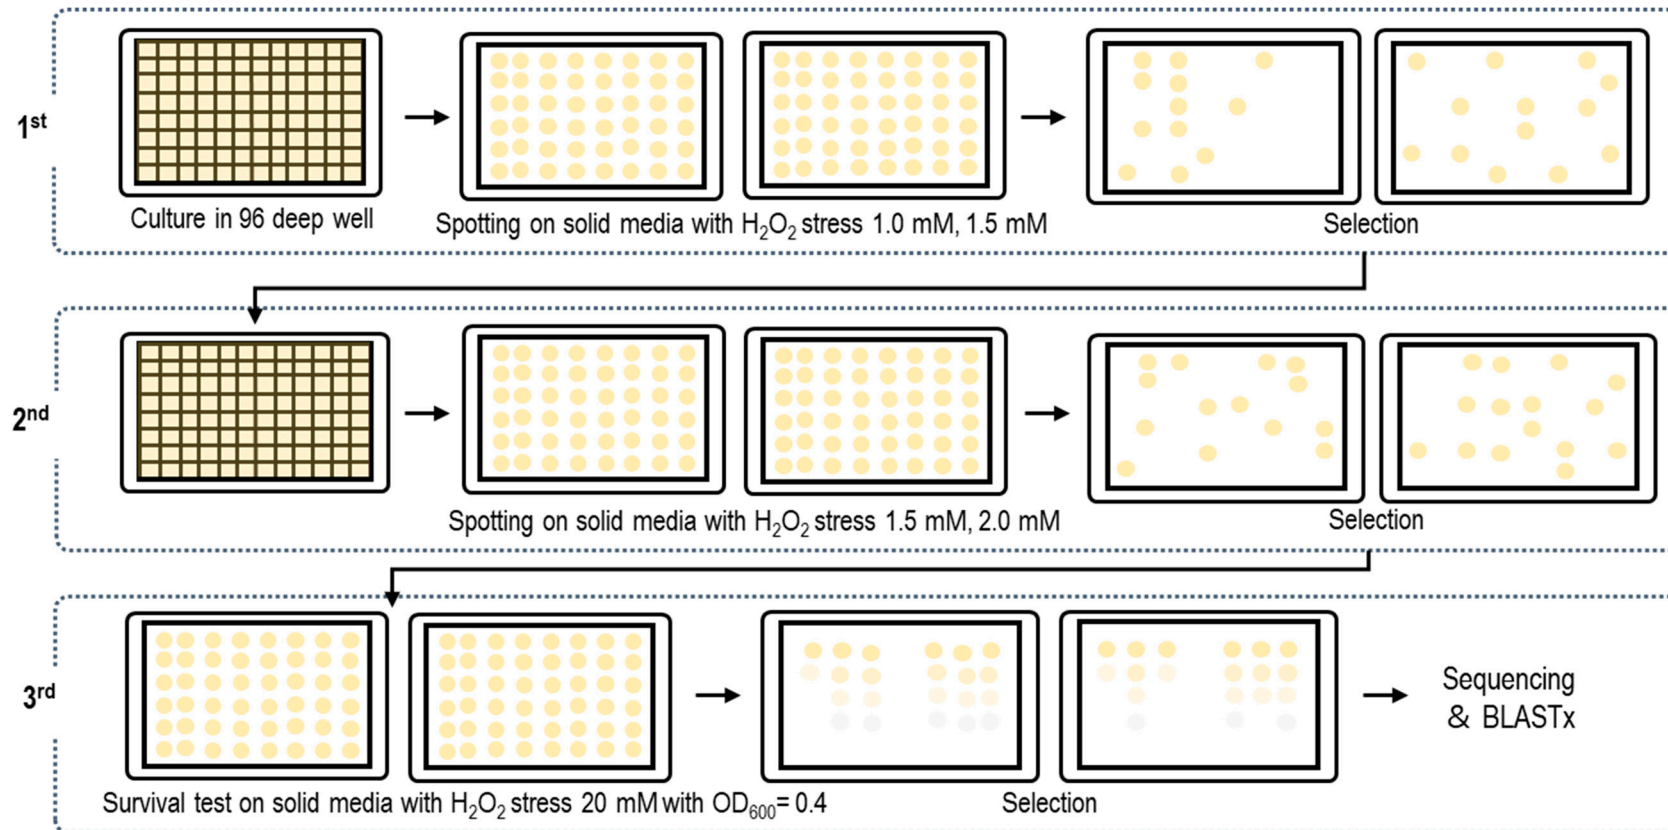

**Supple Fig. S1.** Screening of positive clones by hydrogen peroxide. *E.coli* (XL1-Blue) containing recombinant DNA fragments were incubated in liquid medium with 50  $\mu\text{g}/\text{mL}$  kanamycin and spotting on 1.0, 1.5, and 2.0 mM  $\text{H}_2\text{O}_2$  in 1<sup>st</sup>, 2<sup>nd</sup> screening step, 20 mM  $\text{H}_2\text{O}_2$  for 1 hr in 3<sup>rd</sup> screening.

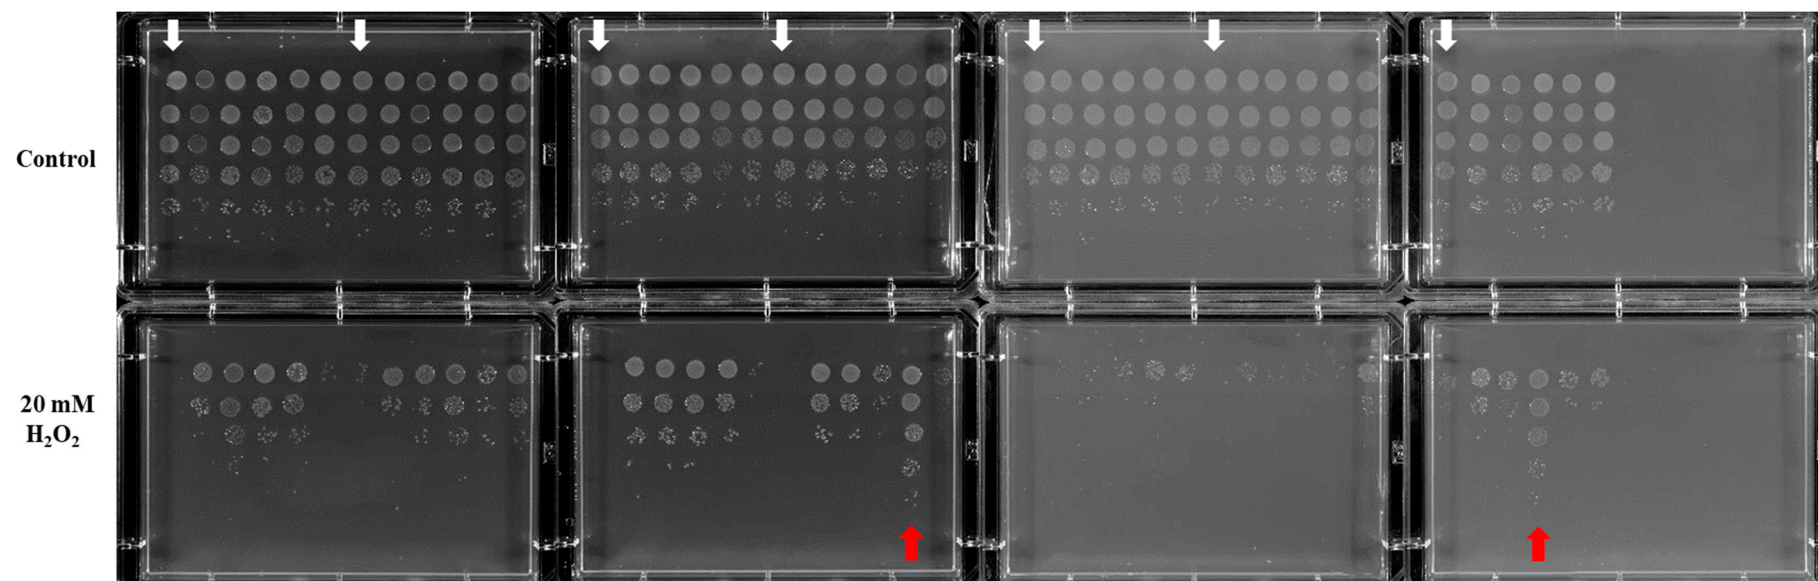

**Supple Fig. S2.** 3rd screening selection. The white arrows indicate *E.coli* harboring empty vector as control; The red arrows indicate selected *E.coli* harboring *D. proteolyticus* genes with outstanding oxidative stress resistance. Adjusting cell OD<sub>600</sub>= 0.4

| TCS HK     | TCS-RR     | DNA binding domain |
|------------|------------|--------------------|
| Deipr_0128 | Deipr_0129 | OmpR family        |
| Deipr_0376 | Deipr_0377 | -                  |
| Deipr_0799 | Deipr_0800 | NarL/FixJ family   |
| Deipr_0870 | Deipr_0871 | NarL/FixJ family   |
| Deipr_1062 | Deipr_1061 | -                  |
| Deipr_1165 | Deipr_1167 | NarL/FixJ family   |
| Deipr_1504 | Deipr_1503 | OmpR family        |
| Deipr_1922 | Deipr_1923 | OmpR family        |
| Deipr_1967 | Deipr_1968 | OmpR family        |
| Deipr_2675 | Deipr_2674 | OmpR family        |
| Deipr_2694 | Deipr_2693 | OmpR family        |

HK : Histidine kinase

RR : Response regulator

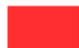

Core gene (>50%)

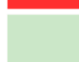

Accessory gene (<50%)

| Orphan HK  | Additional domain |
|------------|-------------------|
| Deipr_0252 | GAF domain        |
| Deipr_0865 | -                 |
| Deipr_1801 | PAS/PAC domain    |
| Deipr_2217 | GAF domain        |
| Deipr_2254 | -                 |
| Deipr_2523 | PAS/PAC domain    |

| Orphan RR  | Domain               |
|------------|----------------------|
| Deipr_0059 | -                    |
| Deipr_0147 | OmpR family          |
| Deipr_0158 | OmpR family          |
| Deipr_0764 | wHTH and BTAD domain |
| Deipr_1307 | OmpR family          |
| Deipr_2630 | -                    |

**Supple Fig. S3.** Core and accessory analysis of two component system, orphan histidine kinase and orphan response regulators in *D. proteolyticus*. Core and accessory genes were determined based on the homology (50%) and functional domains were analyzed using interpro database.
